# Supplementary material for: Potassium supporting electrolyte enhances stability of Ti-substituted polyoxovanadates for nonaqueous redox flow batteries
Source: Royal Society of Chemistry journal article supplement (doi:10.1039/d3ta06432h), 2023-12-05
Supplement: d3ta06432h1.pdf [file d3ta06432h1.pdf]

Electronic Supporting Information (ESI)

## Potassium Supporting Electrolyte Enhances Stability of Ti-substituted Polyoxovanadates for Nonaqueous Redox Flow Batteries

*Mamta Dagar, William W. Brennessel, and Ellen M. Matson\**

Department of Chemistry, University of Rochester, Rochester, NY 14627, USA

Email: [matson@chem.rochester.edu](mailto:matson@chem.rochester.edu)

### Supporting Information Table of Contents

|                                                                                                                                                                                                                        |     |
|------------------------------------------------------------------------------------------------------------------------------------------------------------------------------------------------------------------------|-----|
| Experimental methods.....                                                                                                                                                                                              | S2  |
| <b>Table S1.</b> Substoichiometric electrochemical titration of LiPF <sub>6</sub> into [Ti <sub>2</sub> V <sub>4</sub> O <sub>5</sub> (OMe) <sub>14</sub> ].....                                                       | S3  |
| <b>Table S2.</b> Substoichiometric electrochemical titration of LiOTf into [Ti <sub>2</sub> V <sub>4</sub> O <sub>5</sub> (OMe) <sub>14</sub> ].....                                                                   | S4  |
| <b>Figure S1.</b> CVs of reduction events of [Ti <sub>2</sub> V <sub>4</sub> O <sub>5</sub> (OMe) <sub>14</sub> ] in LiPF <sub>6</sub> at slow scan rates.....                                                         | S5  |
| <b>Table S3.</b> Substoichiometric electrochemical titration of KPF <sub>6</sub> into [Ti <sub>2</sub> V <sub>4</sub> O <sub>5</sub> (OMe) <sub>14</sub> ].....                                                        | S5  |
| <b>Figure S2.</b> CVs of electrochemical titration of KPF <sub>6</sub> with [Ti <sub>2</sub> V <sub>4</sub> O <sub>5</sub> (OMe) <sub>14</sub> ].....                                                                  | S6  |
| <b>Table S4.</b> DMF titration of [Ti <sub>2</sub> V <sub>4</sub> O <sub>5</sub> (OMe) <sub>14</sub> ] solution pre-titrated with KPF <sub>6</sub> .....                                                               | S6  |
| <b>Figure S3.</b> Bulk oxidation of [Ti <sub>2</sub> V <sub>4</sub> O <sub>5</sub> (OMe) <sub>14</sub> ] in LiPF <sub>6</sub> and KPF <sub>6</sub> .....                                                               | S7  |
| <b>Figure S4.</b> CV of crude [K{Ti <sub>2</sub> V <sub>4</sub> (OCH <sub>3</sub> ) <sub>14</sub> }].....                                                                                                              | S7  |
| <b>Figure S5.</b> <sup>1</sup> H NMR spectra of [K{Ti <sub>2</sub> V <sub>4</sub> (OCH <sub>3</sub> ) <sub>14</sub> }].....                                                                                            | S8  |
| <b>Figure S6.</b> IR spectrum of [K{Ti <sub>2</sub> V <sub>4</sub> (OCH <sub>3</sub> ) <sub>14</sub> }].....                                                                                                           | S8  |
| <b>Figure S7.</b> Electronic absorption spectrum of [K{Ti <sub>2</sub> V <sub>4</sub> (OCH <sub>3</sub> ) <sub>14</sub> }].....                                                                                        | S9  |
| <b>Table S5.</b> Crystallographic parameters for [K{Ti <sub>2</sub> V <sub>4</sub> (OCH <sub>3</sub> ) <sub>14</sub> }].....                                                                                           | S10 |
| <b>Table S6.</b> Bond valence sum calculations for K[Ti <sub>2</sub> V <sub>4</sub> O <sub>5</sub> (OMe) <sub>14</sub> ].....                                                                                          | S11 |
| <b>Figure S8.</b> Full charge-discharge cycles in TBAPF <sub>6</sub> and KPF <sub>6</sub> .....                                                                                                                        | S12 |
| <b>Figure S9.</b> Monitoring of bulk electrolyzed solutions of [Ti <sub>2</sub> V <sub>4</sub> O <sub>5</sub> (OMe) <sub>14</sub> ]<br>in TBAPF <sub>6</sub> at 30°C.....                                              | S13 |
| <b>Figure S10.</b> Monitoring of bulk electrolyzed solutions of [Ti <sub>2</sub> V <sub>4</sub> O <sub>5</sub> (OMe) <sub>14</sub> ]<br>in KPF <sub>6</sub> at 30°C.....                                               | S14 |
| <b>Figure S11.</b> Long-term stability analysis of bulk reduced samples of<br>[Ti <sub>2</sub> V <sub>4</sub> O <sub>5</sub> (OMe) <sub>14</sub> ] in TBAPF <sub>6</sub> and KPF <sub>6</sub> at room temperature..... | S15 |
| <b>Figure S12.</b> CV of 1 <sup>+/0</sup> redox couple of [Ti <sub>2</sub> V <sub>4</sub> O <sub>5</sub> (OMe) <sub>14</sub> ] with                                                                                    |     |

|                                                                                                                                                                                                           |     |
|-----------------------------------------------------------------------------------------------------------------------------------------------------------------------------------------------------------|-----|
| 0.1 M KPF <sub>6</sub> at varying scan rates.....                                                                                                                                                         | S15 |
| <b>Figure S13.</b> CV of <b>0/1<sup>-</sup></b> redox couple of [Ti <sub>2</sub> V <sub>4</sub> O <sub>5</sub> (OMe) <sub>14</sub> ] with<br>0.1 M KPF <sub>6</sub> at varying scan rates.....            | S16 |
| <b>Figure S14.</b> Randles–Sevcik analysis of <b>1<sup>+</sup>/0</b> and <b>0/1<sup>-</sup></b> redox couples.....                                                                                        | S16 |
| <b>Figure S15.</b> Plot of Δ <i>E</i> <sub>p</sub> vs (scan rate) <sup>1/2</sup> for [Ti <sub>2</sub> V <sub>4</sub> O <sub>5</sub> (OMe) <sub>14</sub> ] with 0.1 M KPF <sub>6</sub> .....               | S17 |
| <b>Figure S16.</b> Plot of Ψ vs (scan rate) <sup>-1/2</sup> for [Ti <sub>2</sub> V <sub>4</sub> O <sub>5</sub> (OMe) <sub>14</sub> ] with 0.1 M KPF <sub>6</sub> .....                                    | S18 |
| <b>Figure S17.</b> Calibration curve for solubility of [Ti <sub>2</sub> V <sub>4</sub> O <sub>5</sub> (OMe) <sub>14</sub> ] in<br>acetonitrile with 0.1 M KPF <sub>6</sub> .....                          | S19 |
| <b>Table S7.</b> Solubility measured for [Ti <sub>2</sub> V <sub>4</sub> O <sub>5</sub> (OMe) <sub>14</sub> ] in acetonitrile with 0.1 M KPF <sub>6</sub> .....                                           | S19 |
| <b>Figure S18.</b> Electronic absorption spectrum of bulk reduced, mono-anionic<br>[Ti <sub>2</sub> V <sub>4</sub> O <sub>5</sub> (OMe) <sub>14</sub> ] in acetonitrile with 0.1 M KPF <sub>6</sub> ..... | S20 |
| <b>Figure S19.</b> Bulk reduction of [Ti <sub>2</sub> V <sub>4</sub> O <sub>5</sub> (OMe) <sub>14</sub> ] to -2 oxidation state in acetonitrile<br>with 0.1 M KPF <sub>6</sub> .....                      | S20 |
| References.....                                                                                                                                                                                           | S21 |

### Experimental methods:

**Determining *D*<sub>0</sub>.** 5 mM concentration of the cluster [Ti<sub>2</sub>V<sub>4</sub>O<sub>5</sub>(OMe)<sub>14</sub>], with 0.1 M KPF<sub>6</sub> as the supporting electrolyte were used in acetonitrile. CV measurements were carried out inside a nitrogen filled glove box (MBraun, USA) using a Bio-Logic SP 150 potentiostat/galvanostat and the EC-Lab software suite. Cyclic voltammograms were recorded using a 3 mm diameter glassy carbon working electrode (CH Instruments, USA), a Pt wire auxiliary electrode (CH Instruments, USA), and a Ag/Ag<sup>+</sup> non-aqueous reference electrode with 0.01 M AgNO<sub>3</sub> in 0.1 M [nBu<sub>4</sub>N][PF<sub>6</sub>] in CH<sub>3</sub>CN (Bio-Logic). Cyclic voltammograms were *iR* compensated at 95% with impedance taken at 100 kHz using the ZIR tool included within the EC-Lab software.

The diffusion coefficient associated with each redox couple was determined by using the slope of the peak current (*i*<sub>p</sub>) versus the square root of scan rate *v*<sup>1/2</sup>. The Randles – Sevcik equation was used to estimate the diffusion coefficients from CV data. For a reversible redox couple, the peak current is given by the Eqn S1:

$$i_p = 2.69 \times 10^5 n^{3/2} A c D_0^{1/2} v^{1/2} \quad \text{Eqn S1}$$

In eq. S1, *n* is the number of electrons transferred; *A* is the electrode area (0.0707 cm<sup>2</sup> for the glassy carbon working electrode); *c* is the bulk concentration of the active species; *D*<sub>0</sub> is the diffusion coefficient of the active species; *v* is the scan rate. For an irreversible redox couple, the peak current, is given by the Eqn S2:

$$i_p = 2.99 \times 10^5 n^{3/2} \alpha^{1/2} A c D_0^{1/2} v^{1/2} \quad \text{Eqn S2}$$

where  $\alpha$  is the charge transfer coefficient. For this study,  $\alpha = 0.5$ .

For the redox couples that show quasi-reversible kinetics, relationships for both reversible and irreversible redox reaction are usually employed to determine the diffusion coefficients of such redox processes. Therefore, an average value of diffusion coefficient was approximated for a quasi-reversible redox couple using both equations S1 and S2.<sup>1-3</sup>

**Calculation of  $k_0$ .** The electron-transfer kinetics was estimated directly from CV measurements by using the Nicholson method.<sup>4</sup> The potential difference ( $\Delta E_p$ ) of oxidation and reduction peaks were obtained at different scan rates. The transfer parameter,  $\psi$ , was extracted from the working curve constructed by Nicholson using  $\Delta E_p$  values. The standard heterogeneous charge-transfer rate constant,  $k_0$ , for a given electron transfer process was determined using Eqn S3:

$$\psi = \nu^{-1/2} k_0 \left( \frac{\pi n F D_0}{RT} \right)^{-1/2} \quad \text{Eqn S3}$$

where  $n$  is the number of electrons transferred,  $F$  is the Faraday constant,  $D$  is the diffusion coefficient,  $\nu$  is the scan rate,  $R$  is the ideal gas constant and  $T$  is the temperature.

**Table S1.** Substoichiometric electrochemical titration of  $\text{LiPF}_6$  into  $[\text{Ti}_2\text{V}_4\text{O}_5(\text{OMe})_{14}]$  analyzed by SWV.

| Equivalents of $\text{LiPF}_6$<br>added | $E_{1/2}$ (V)                                              |                                                            |
|-----------------------------------------|------------------------------------------------------------|------------------------------------------------------------|
|                                         | 2 <sup>nd</sup> Ti <sup>III</sup> /Ti <sup>IV</sup> couple | 1 <sup>st</sup> Ti <sup>III</sup> /Ti <sup>IV</sup> couple |
| 0 eq.                                   | -2.09 V                                                    | -1.60 V                                                    |
| 0.2 eq.                                 | -2.08 V                                                    | -1.60 V                                                    |
| 0.4 eq.                                 | -2.08 V                                                    | -1.59 V                                                    |
| 0.6 eq.                                 | -2.03 V                                                    | -1.58 V                                                    |
| 0.8 eq.                                 | -2.02 V                                                    | -1.58 V                                                    |
| 1 eq.                                   | -2.01 V                                                    | -1.57 V                                                    |
| 1.2 eq.                                 | -2.00 V                                                    | -1.55 V                                                    |
| 2 eq.                                   | -                                                          | -1.52 V                                                    |

**Table S2.** Substoichiometric electrochemical titration of LiOTf into  $[\text{Ti}_2\text{V}_4\text{O}_5(\text{OMe})_{14}]$  analyzed by SWV.

| Equivalents of LiOTf added | $E_{1/2}$ (V)                                              |                                                            |
|----------------------------|------------------------------------------------------------|------------------------------------------------------------|
|                            | 2 <sup>nd</sup> Ti <sup>III</sup> /Ti <sup>IV</sup> couple | 1 <sup>st</sup> Ti <sup>III</sup> /Ti <sup>IV</sup> couple |
| 0 eq.                      | -2.09 V                                                    | -1.60 V                                                    |
| 0.2 eq.                    | -2.02 V                                                    | -1.59 V                                                    |
| 0.4 eq.                    | -1.99 V                                                    | -1.59 V                                                    |
| 0.6 eq.                    | -2.00 V                                                    | -1.58 V                                                    |
| 0.8 eq.                    | -1.98 V                                                    | -1.57 V                                                    |
| 1 eq.                      | -1.98 V                                                    | -1.56 V                                                    |
| 1.2 eq.                    | -1.98 V                                                    | -1.56 V                                                    |
| 2 eq.                      | -                                                          | -1.50 V                                                    |

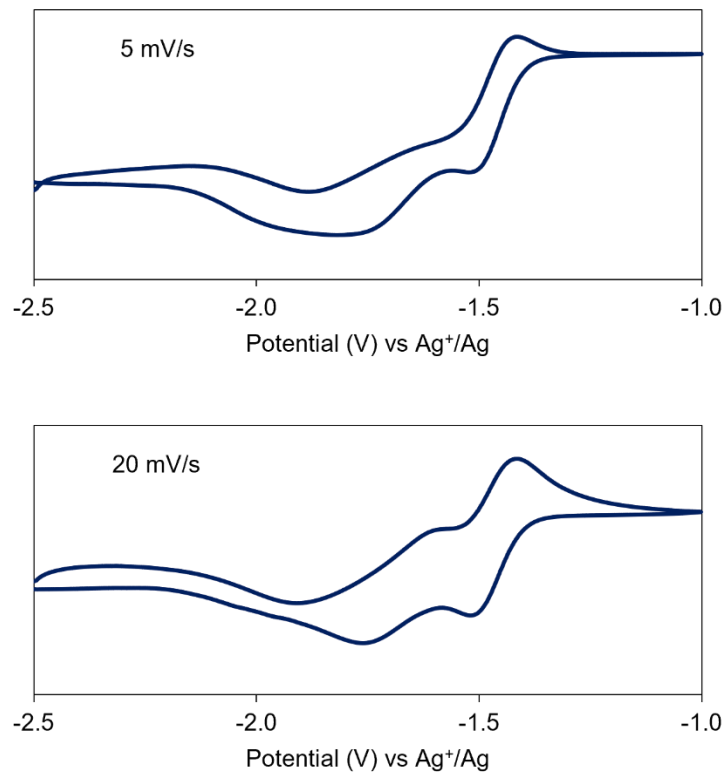

**Figure S1.** CVs of reduction events of  $[\text{Ti}_2\text{V}_4\text{O}_5(\text{OMe})_{14}]$  with 0.1 M  $\text{LiPF}_6$  in acetonitrile at 5 mV/s (top) and 20 mV/s (bottom).

**Table S3.** Substoichiometric electrochemical titration of  $\text{KPF}_6$  into  $[\text{Ti}_2\text{V}_4\text{O}_5(\text{OMe})_{14}]$  analyzed by SWV.

| Equivalents of $\text{KPF}_6$ added | $E_{1/2}$ (V)                                                         |                                                                       |
|-------------------------------------|-----------------------------------------------------------------------|-----------------------------------------------------------------------|
|                                     | 2 <sup>nd</sup> $\text{Ti}^{\text{III}}/\text{Ti}^{\text{IV}}$ couple | 1 <sup>st</sup> $\text{Ti}^{\text{III}}/\text{Ti}^{\text{IV}}$ couple |
| 0 eq.                               | -2.10 V                                                               | -1.60 V                                                               |
| 0.2 eq.                             | -2.04 V                                                               | -1.60 V                                                               |
| 0.4 eq.                             | -2.04 V                                                               | -1.60 V                                                               |
| 0.6 eq.                             | -2.04 V                                                               | -1.59 V                                                               |
| 0.8 eq.                             | -2.03 V                                                               | -1.59 V                                                               |
| 1 eq.                               | -2.03 V                                                               | -1.59 V                                                               |
| 1.2 eq.                             | -2.01 V                                                               | -1.59 V                                                               |
| 2 eq.                               | -2.01 V                                                               | -1.59 V                                                               |

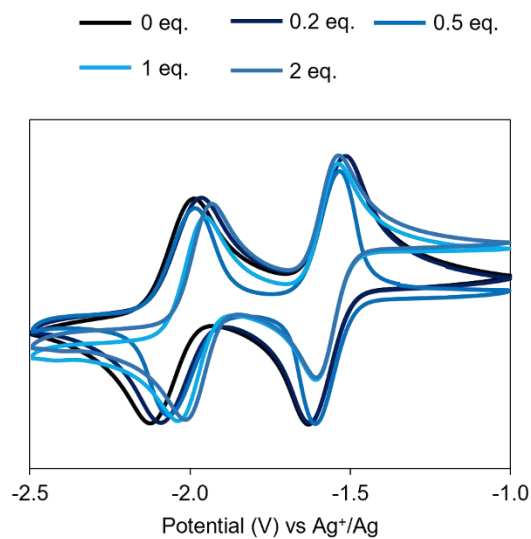

**Figure S2.** CVs of titration experiments conducted with substoichiometric titrations of  $\text{KPF}_6$  into 5mM  $[\text{Ti}_2\text{V}_4\text{O}_5(\text{OMe})_{14}]$  solution in acetonitrile with 0.1 M  $\text{TBAPF}_6$ .

**Table S4.** DMF titration in the  $[\text{Ti}_2\text{V}_4\text{O}_5(\text{OMe})_{14}]$  solution originally with 0.1 M  $\text{TBAPF}_6$  that is pre-titrated with  $\text{KPF}_6$ .

| Volume of DMF added | $E_{1/2}$ (V)                                                         |                                                                       |
|---------------------|-----------------------------------------------------------------------|-----------------------------------------------------------------------|
|                     | 2 <sup>nd</sup> $\text{Ti}^{\text{III}}/\text{Ti}^{\text{IV}}$ couple | 1 <sup>st</sup> $\text{Ti}^{\text{III}}/\text{Ti}^{\text{IV}}$ couple |
| 0 $\mu\text{L}$     | -1.94 V                                                               | -1.57 V                                                               |
| 50 $\mu\text{L}$    | -1.94 V                                                               | -1.57 V                                                               |
| 100 $\mu\text{L}$   | -1.94 V                                                               | -1.57 V                                                               |
| 200 $\mu\text{L}$   | -1.99 V                                                               | -1.57 V                                                               |
| 400 $\mu\text{L}$   | -2.00 V                                                               | -1.57 V                                                               |
| 500 $\mu\text{L}$   | -2.00 V                                                               | -1.57 V                                                               |
| 700 $\mu\text{L}$   | -2.01 V                                                               | -1.57 V                                                               |
| 1 mL                | -2.03 V                                                               | -1.57 V                                                               |
| 2 mL                | -2.06 V                                                               | -1.57 V                                                               |
| 4 mL                | -2.10 V                                                               | -1.58 V                                                               |

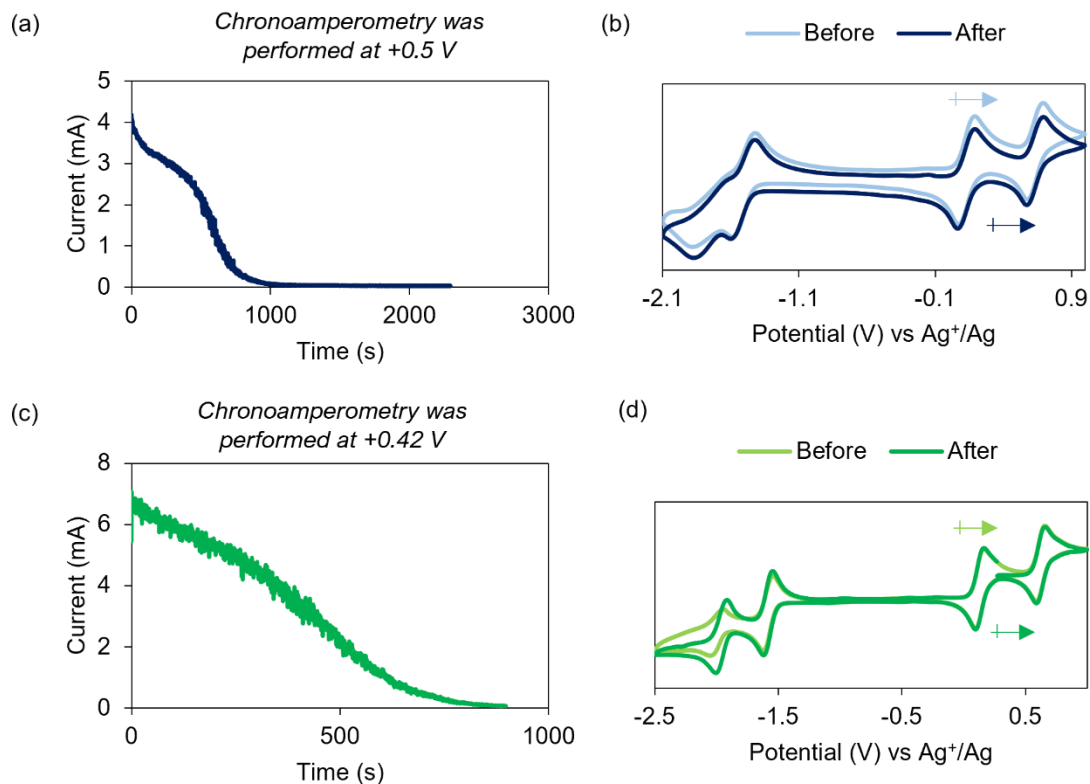

**Figure S3.** Bulk oxidation of  $[\text{Ti}_2\text{V}_4\text{O}_5(\text{OMe})_{14}]$  in  $\text{LiPF}_6$  (top, blue) and  $\text{KPF}_6$  (bottom, green). (a) and (c) represent the corresponding  $I-t$  curves. (b) and (d) denote the CVs before and after chronoamperometry measurements. The arrows denote the open circuit voltage associated with each CV trace.

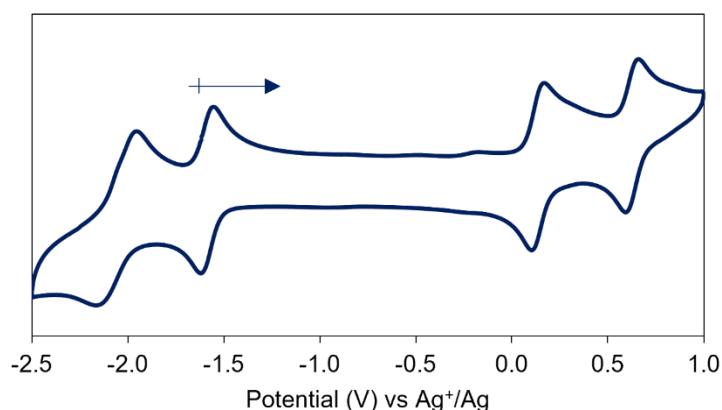

**Figure S4.** Cyclic voltammogram of the synthesized cluster  $[\text{K}\{\text{Ti}_2\text{V}_4(\text{OCH}_3)_{14}\}]$  recorded at 100 mV/s with 0.1 M  $\text{TBAPF}_6$  in acetonitrile. The arrow indicates the open circuit voltage of the resultant cluster.

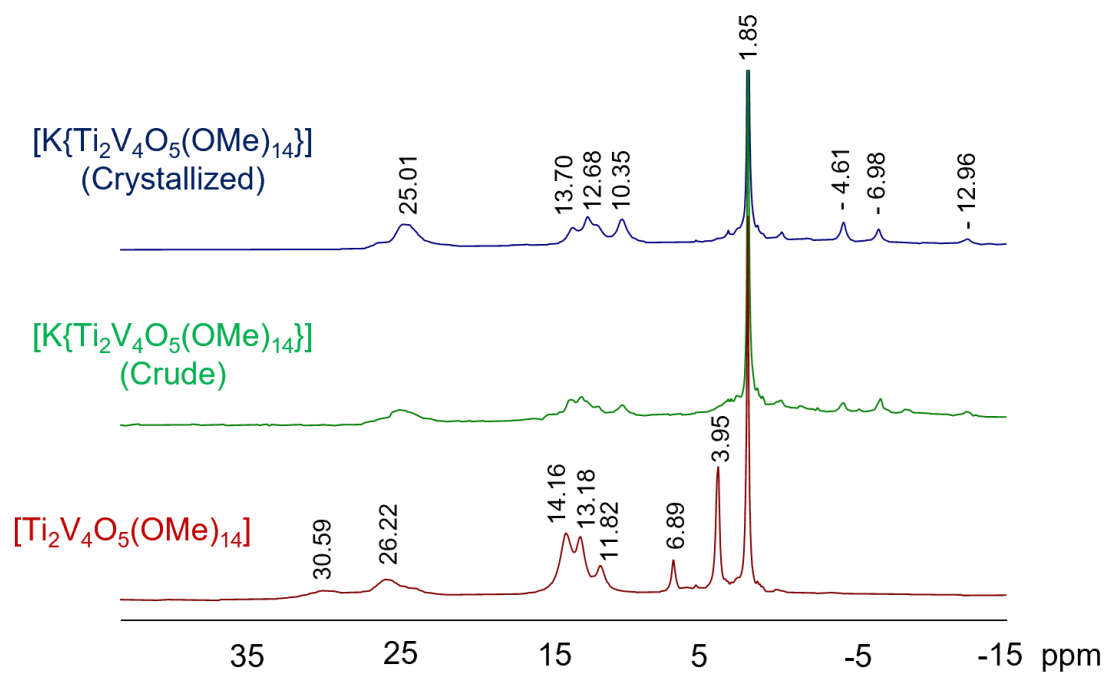

**Figure S5.**  $^1H$  NMR of crude (green) and recrystallized (blue)  $[K\{Ti_2V_4(OCH_3)_{14}\}]$  compared to  $[Ti_2V_4O_5(OMe)_{14}]$  (red). All NMRs are collected in  $CD_3CN$ .

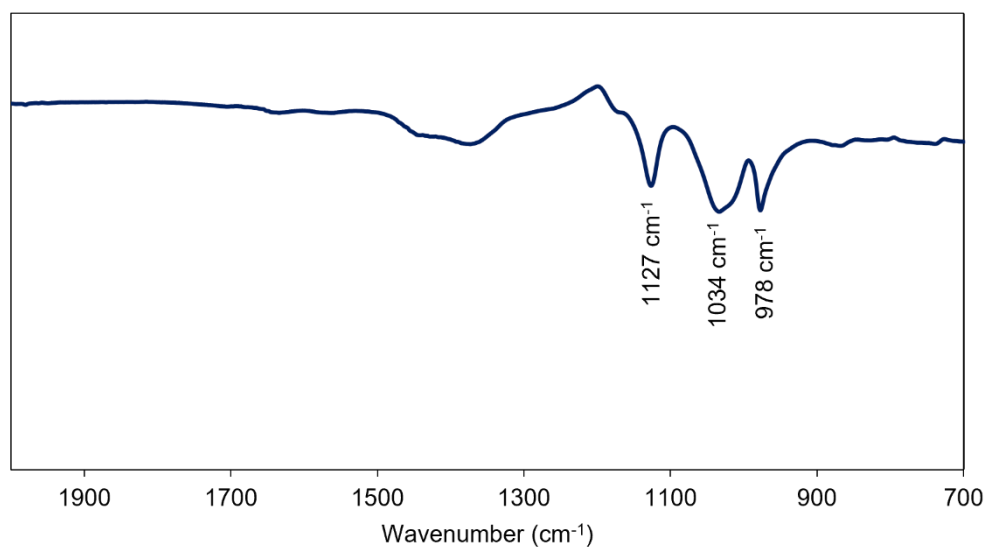

**Figure S6.** IR spectrum of the synthesized cluster  $[K\{Ti_2V_4(OCH_3)_{14}\}]$ .



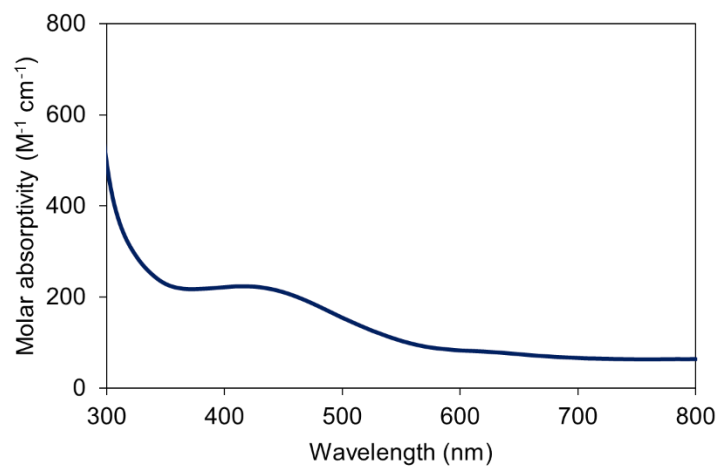

**Figure S7.** Electronic absorption spectrum of the synthesized cluster  $[K\{Ti_2V_4(OCH_3)_{14}\}]$ .

**Table S5.** Crystallographic parameters for molecular structure of  $[K\{Ti_2V_4(OCH_3)_{14}\}]$ .

|                                         |                                                                                                                                         |
|-----------------------------------------|-----------------------------------------------------------------------------------------------------------------------------------------|
| Empirical formula                       | $C_{14}H_{42}KO_{19}Ti_2V_4$                                                                                                            |
| Formula weight                          | 853.13                                                                                                                                  |
| Temperature                             | 100.01(10) K                                                                                                                            |
| Wavelength                              | 1.54184 Å                                                                                                                               |
| Crystal system                          | orthorhombic                                                                                                                            |
| Space group                             | $P2_12_12_1$                                                                                                                            |
| Unit cell dimensions                    | $a = 8.99550(10)$ Å<br>$\alpha = 90^\circ$<br>$b = 18.26630(10)$ Å<br>$\beta = 90^\circ$<br>$c = 18.70880(10)$ Å<br>$\gamma = 90^\circ$ |
| Volume                                  | $3074.13(4)$ Å <sup>3</sup>                                                                                                             |
| Z                                       | 4                                                                                                                                       |
| Reflections collected                   | 38130                                                                                                                                   |
| Independent reflections                 | 6604 [ $R(\text{int}) = 0.0398$ ]                                                                                                       |
| Observed reflections                    | 6418                                                                                                                                    |
| Completeness to $\theta = 74.504^\circ$ | 100.0%                                                                                                                                  |
| Absorption correction                   | Multi-scan                                                                                                                              |
| Max. and min. transmission              | 1.00000 and 0.38869                                                                                                                     |
| Refinement method                       | Full-matrix least-squares on $F^2$                                                                                                      |
| Data / restraints / parameters          | 6604 / 0 / 376                                                                                                                          |
| Goodness-of-fit on $F^2$                | 1.036                                                                                                                                   |
| Final $R$ indices [ $>2\sigma(I)$ ]     | $R1 = 0.0308$ , $wR2 = 0.0813$                                                                                                          |
| $R$ indices (all data)                  | $R1 = 0.0318$ , $wR2 = 0.0818$                                                                                                          |
| Absolute structure parameter            | 0.413(7)                                                                                                                                |
| Largest diff. peak and hole             | 1.303 and -0.497 e.Å <sup>-3</sup>                                                                                                      |

**Table S6.** Bond valence sum calculations for  $\text{K}[\text{Ti}_2\text{V}_4\text{O}_5(\text{OMe})_{14}]$  based on X-ray crystallographic data collected at 100 K.

| Compound                                                     | Ti <sup>III</sup> | Ti <sup>IV</sup> | V <sup>IV</sup> | V <sup>V</sup> | Bond valence sums |             |             |              |             |             |             |
|--------------------------------------------------------------|-------------------|------------------|-----------------|----------------|-------------------|-------------|-------------|--------------|-------------|-------------|-------------|
|                                                              |                   |                  |                 |                | Ti(1)             | Ti(2)       | V(3)        | V(4)         | V(5)        | V(6)        |             |
| $\text{K}[\text{Ti}_2\text{V}_4\text{O}_5(\text{OMe})_{14}]$ | 1                 | 1                | -               | -              | Ti <sup>III</sup> | <b>3.21</b> | <b>3.88</b> | -            | -           | -           | -           |
|                                                              |                   |                  |                 |                | Ti <sup>IV</sup>  | <b>3.43</b> | <b>4.01</b> |              |             |             |             |
|                                                              |                   |                  |                 |                | V <sup>IV</sup>   | -           | -           | <b>4.013</b> | <b>3.83</b> | <b>4.02</b> | <b>4.01</b> |
|                                                              |                   |                  |                 |                | V <sup>V</sup>    | -           | -           | 4.22         | 4.04        | 4.24        | 4.22        |

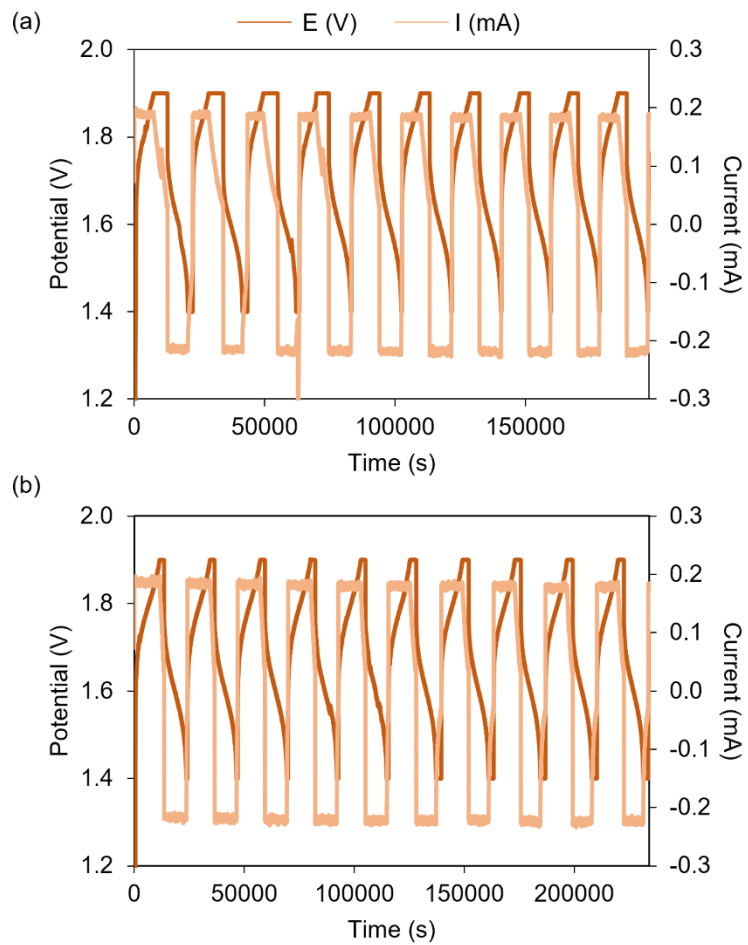

**Figure S8.** Charge-discharge traces of 10 cycles obtained for  $[\text{Ti}_2\text{V}_4\text{O}_5(\text{OMe})_{14}]$  in (a) TBAPF<sub>6</sub> (b) KPF<sub>6</sub>.

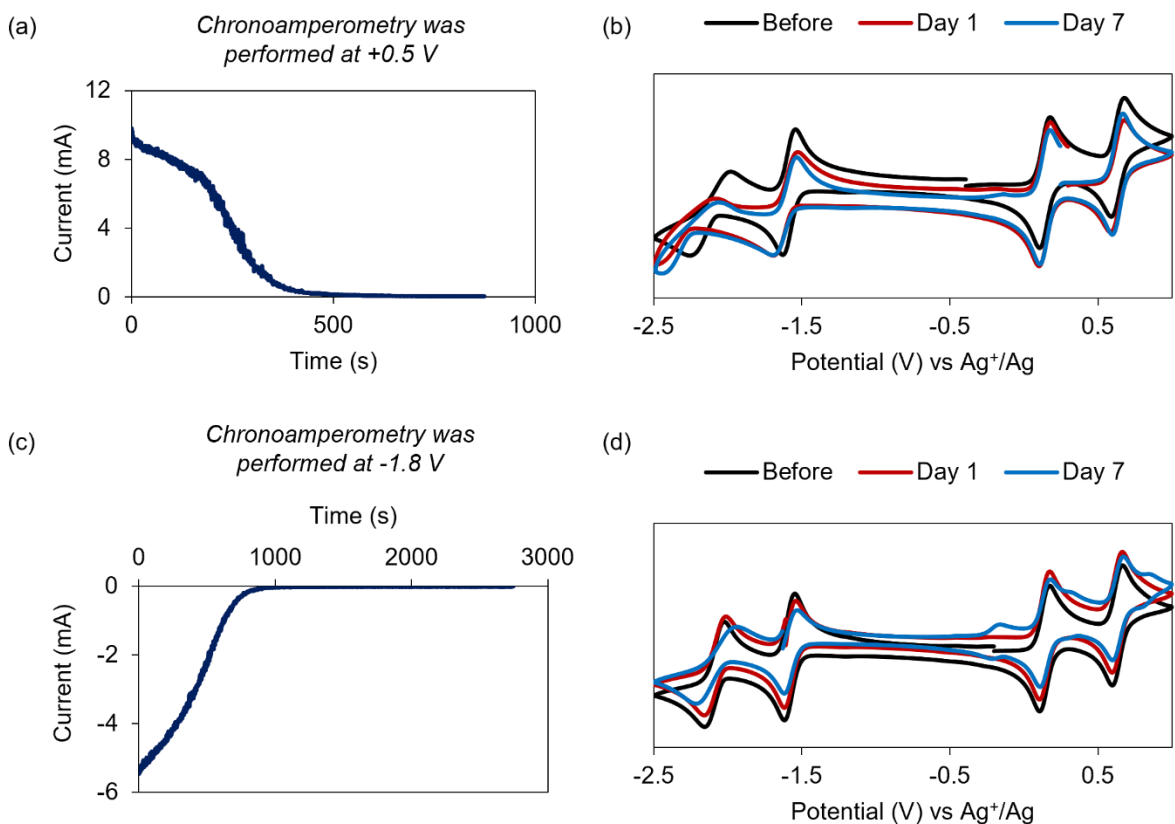

**Figure S9.** Monitoring of bulk electrolyzed solutions of  $[\text{Ti}_2\text{V}_4\text{O}_5(\text{OMe})_{14}]$  in  $\text{TBAPF}_6$  at  $30^\circ\text{C}$ . (a) and (c) represent  $I-t$  curves associated with bulk oxidation and bulk reduction, respectively. (b) and (d) represent the corresponding CVs. Bulk electrolysis was carried out at room temperature and the resultant solution was heated at  $30^\circ\text{C}$  for 7 days. Breaks in the voltammograms indicate the open circuit voltage of the resultant solution.

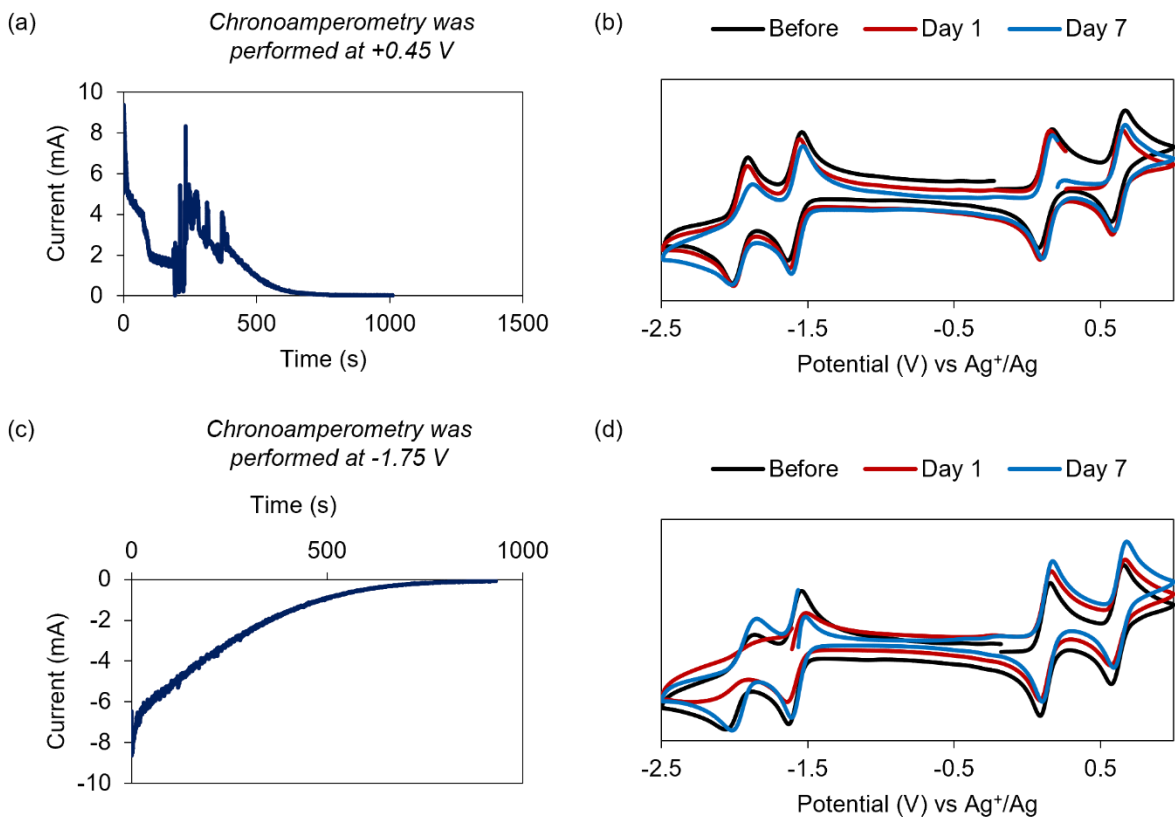

**Figure S10.** Monitoring of bulk electrolyzed solutions of  $[\text{Ti}_2\text{V}_4\text{O}_5(\text{OMe})_{14}]$  in  $\text{KPF}_6$  at  $30^\circ\text{C}$ . (a) and (c) represent  $I-t$  curves associated with bulk oxidation and bulk reduction, respectively. (b) and (d) represent the corresponding CVs. Bulk electrolysis was carried out at room temperature and the resultant solution was heated at  $30^\circ\text{C}$  for 7 days. Breaks in the voltammograms indicate the open circuit voltage of the resultant solution. Note – The spurious responses in (a) are due to the stirring being interrupted during the experiment.

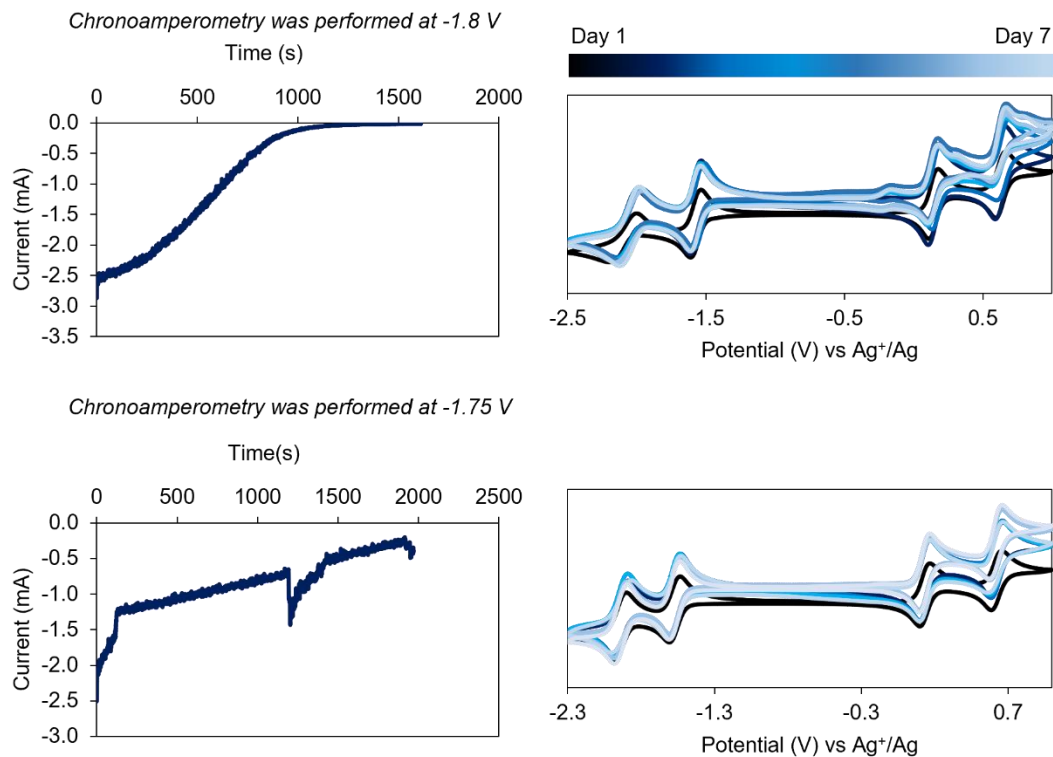

**Figure S11.** Long-term stability analysis of bulk reduced samples of  $[\text{Ti}_2\text{V}_4\text{O}_5(\text{OMe})_{14}]$  in acetonitrile with 0.1 M  $[\text{nBu}_4\text{N}][\text{PF}_6]$  (top) and 0.1 M  $\text{KPF}_6$  (bottom) at room temperature.

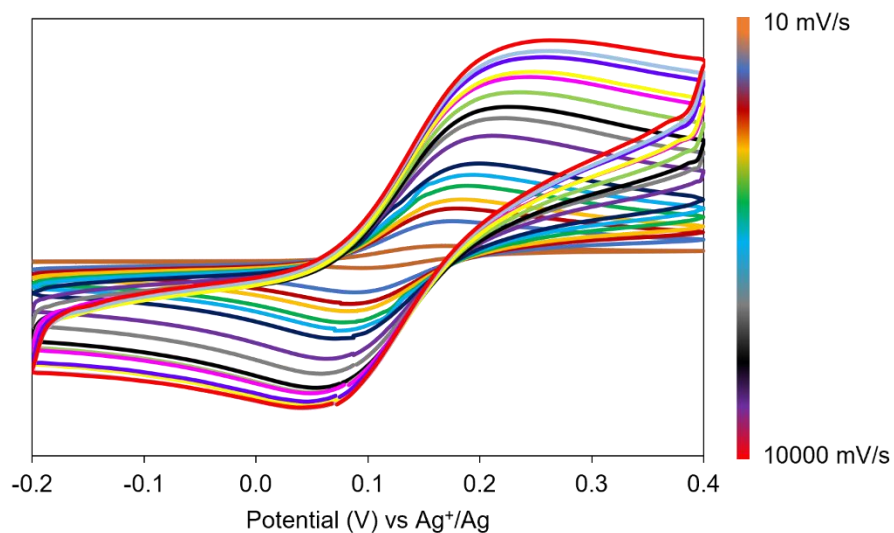

**Figure S12.** Cyclic voltammograms of  $1^+/0$  redox couple of  $[\text{Ti}_2\text{V}_4\text{O}_5(\text{OMe})_{14}]$  with 0.1 M  $\text{KPF}_6$  at scan rates ranging from 10 – 10000 mV/s in acetonitrile.

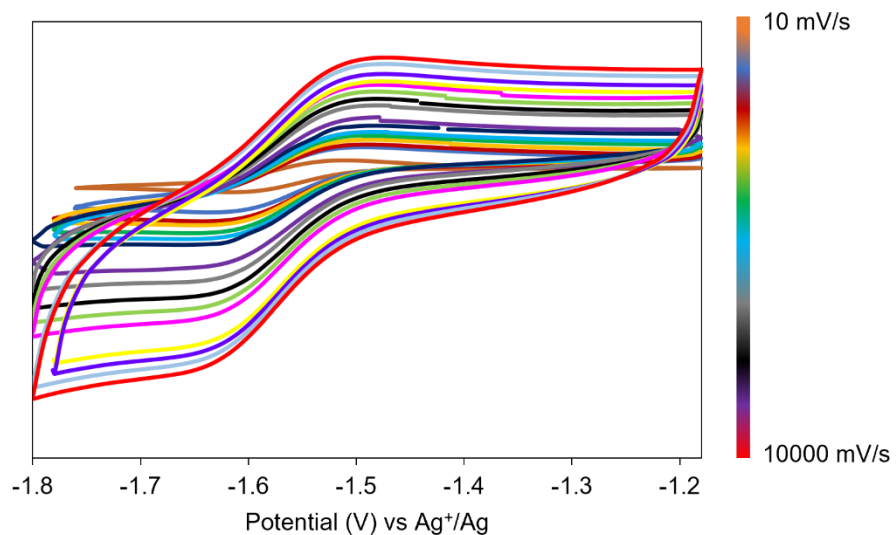

**Figure S13.** Cyclic voltammograms of  $0/1^-$  redox couple of  $[\text{Ti}_2\text{V}_4\text{O}_5(\text{OMe})_{14}]$  with 0.1 M  $\text{KPF}_6$  at scan rates ranging from 10 – 10000 mV/s in acetonitrile.

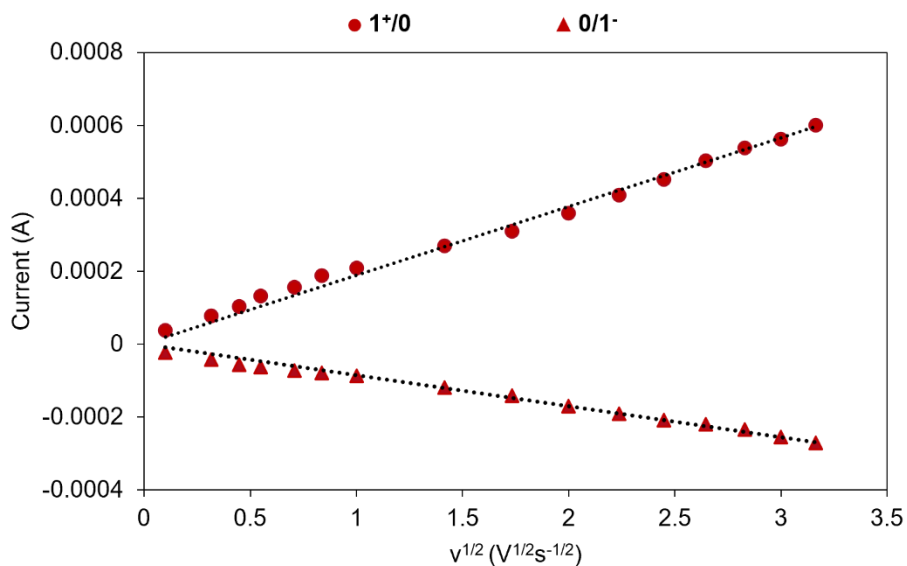

**Figure S14.** Randles–Sevcik analysis of  $1^+/0$  and  $0/1^-$  redox couples of  $[\text{Ti}_2\text{V}_4\text{O}_5(\text{OMe})_{14}]$  with 0.1 M  $\text{KPF}_6$  in acetonitrile.



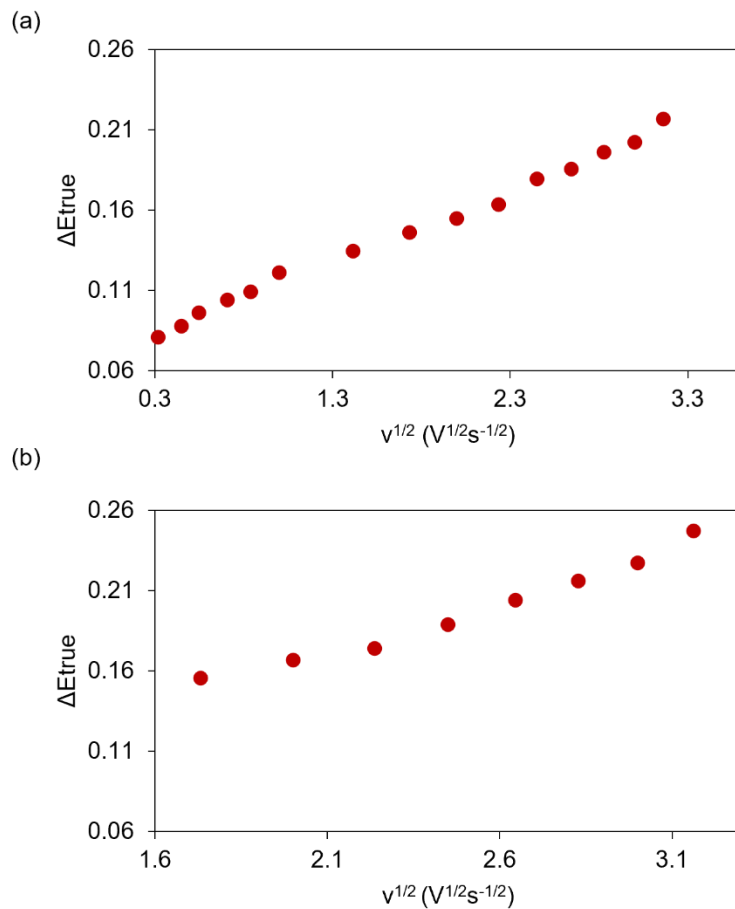

**Figure S15.** Plot of  $\Delta E_p$  vs  $(\text{scan rate})^{1/2}$  for  $[\text{Ti}_2\text{V}_4\text{O}_5(\text{OMe})_{14}]$  with 0.1 M  $\text{KPF}_6$  for the (a)  $1^+/0$  and (b)  $0/1^-$  redox couples.

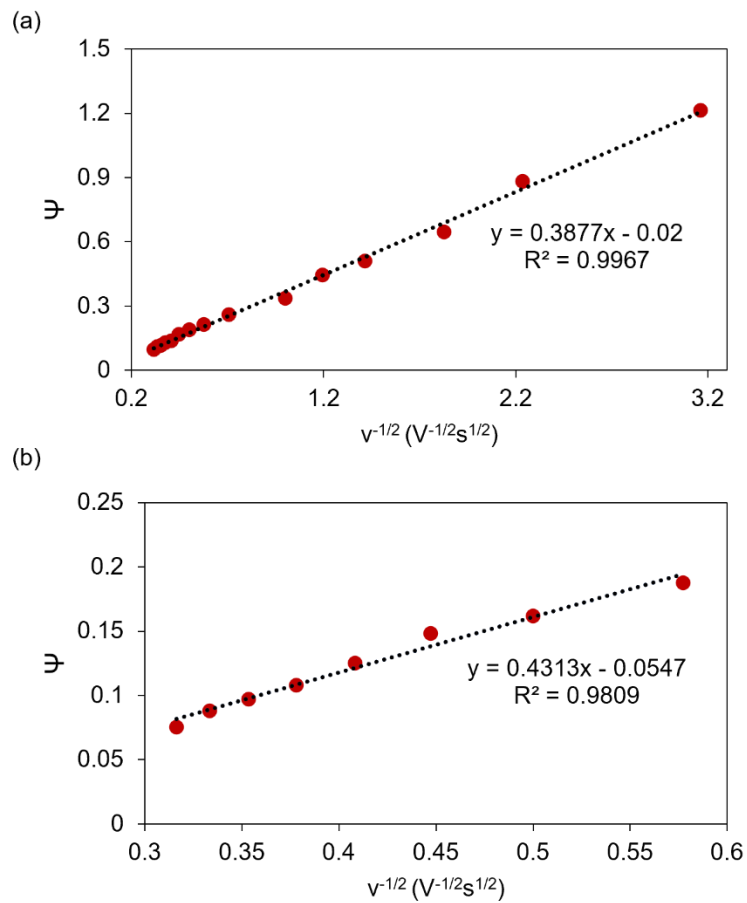

**Figure S16.** Plot of  $\Psi$  vs (scan rate)<sup>-1/2</sup> for [Ti<sub>2</sub>V<sub>4</sub>O<sub>5</sub>(OMe)<sub>14</sub>] with 0.1 M KPF<sub>6</sub> for the (a) **1<sup>+</sup>/0** and (b) **0/1<sup>-</sup>** redox couples.

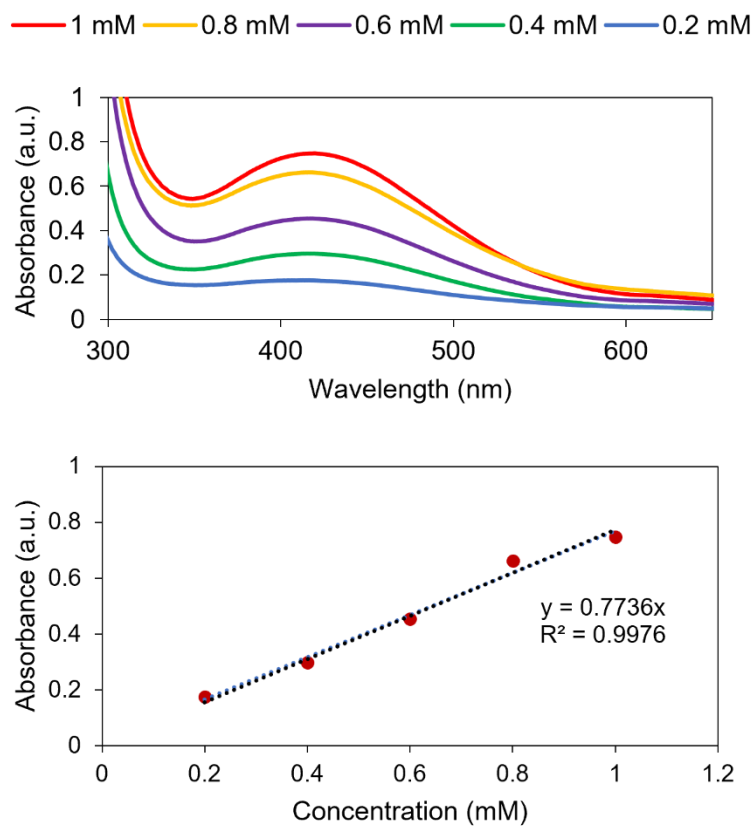

**Figure S17.** Calibration curve for solubility of  $[\text{Ti}_2\text{V}_4\text{O}_5(\text{OMe})_{14}]$  in acetonitrile with 0.1 M  $\text{KPF}_6$ .

**Table S7.** Solubility measured for  $[\text{Ti}_2\text{V}_4\text{O}_5(\text{OMe})_{14}]$  in acetonitrile with 0.1 M  $\text{KPF}_6$ .

| <b>Trials</b> | <b>Absorbance at 420 nm</b> | <b>Diluted concentration (mM)</b> | <b>Saturated concentration (mM)</b> |
|---------------|-----------------------------|-----------------------------------|-------------------------------------|
| 1             | 0.1701                      | 0.2198                            | 43.97                               |
| 2             | 0.1727                      | 0.2232                            | 44.64                               |
| 3             | 0.1953                      | 0.2524                            | 50.49                               |

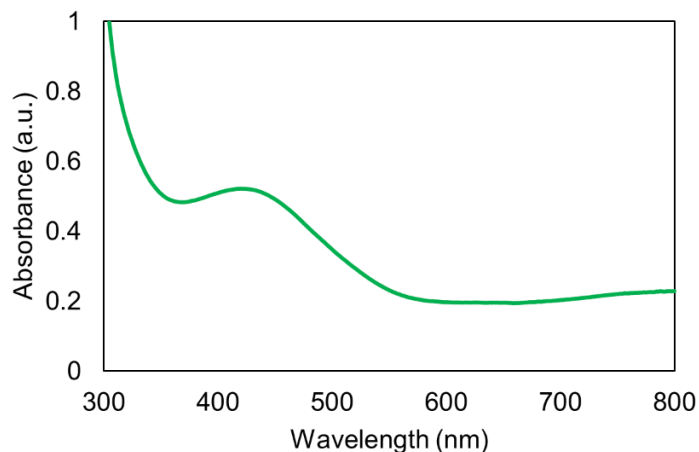

**Figure S18.** Electronic absorption spectrum of bulk reduced, mono-anionic  $[\text{Ti}_2\text{V}_4\text{O}_5(\text{OMe})_{14}]$  in acetonitrile with 0.1 M  $\text{KPF}_6$ .

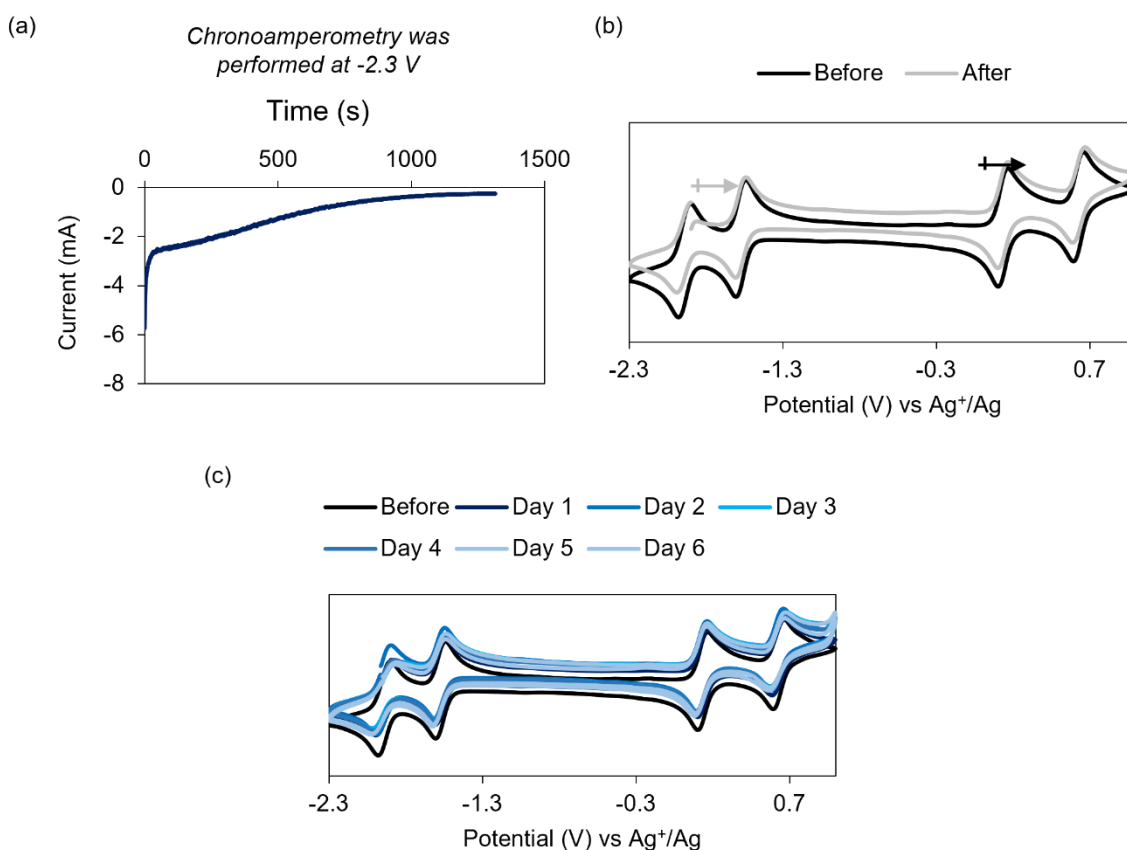

**Figure S19.** Bulk reduction of  $[\text{Ti}_2\text{V}_4\text{O}_5(\text{OMe})_{14}]$  to -2 oxidation state in acetonitrile with 0.1 M  $\text{KPF}_6$ . (a) represents  $I-t$  curves associated with bulk reduction (b) depicts the corresponding CVs (c) demonstrates the stability of the bulk reduced sample as monitored via CV at room temperature for 6 days.

## References.

1. Liu, Q. H.; Sleightholme, A. E. S.; Shinkle, A. A.; Li, Y. D.; Thompson, L. T. Non-aqueous vanadium acetylacetonate electrolyte for redox flow batteries. *Electrochemistry Communications* **2009**, *11*, 2312-2315.
2. Sleightholme, A. E. S.; Shinkle, A. A.; Liu, Q. H.; Li, Y. D.; Monroe, C. W.; Thompson, L. T. Non-aqueous manganese acetylacetonate electrolyte for redox flow batteries. *Journal of Power Sources* **2011**, *196*, 5742-5745.
3. Kosswattaarachchi, A. M.; VanGelder, L. E.; Nachtigall, O.; Hazelnis, J. P.; Brennessel, W. W.; Matson, E. M.; Cook, T. R. Transport and Electron Transfer Kinetics of Polyoxovanadate-Alkoxide Clusters. *Journal of the Electrochemical Society* **2019**, *166*, A464-A472.
4. Nicholson, R. S. THEORY AND APPLICATION OF CYCLIC VOLTAMMETRY FOR MEASUREMENT OF ELECTRODE REACTION KINETICS. *Analytical Chemistry* **1965**, *37*, 1351-1355.
